# Supplementary material for: IDENTIFICATION OF HUMAN GENETIC VARIANTS MODULATING THE COURSE OF COVID-19 INFECTION
Source: Research Square preprint supplement (doi:10.21203/rs.3.rs-2397519/v1), 2023-01-12
Supplement: Supplementary file 1 [file 234ae1524234752e786cfa0e.xlsx]

## Sheet: Sheet1
	Total (n=60)	Mild symptoms (n=20)	Moderate symptoms (n=20)	Severe symptoms (n=20)
Sex distribution
Male	35 (58.33%)	9 (45.00%)	10 (50.00%)	6 (30.00%)
Female	25 (41.67%)	11 (55.00%)	10 (50.00%)	14 (70.00%)
p-value	0.096	0.317	1000	0.000063
Age distribution
Mean age	59067	48.55	61.00	67.65
p-value		Mild vs. moderate	Moderate vs. severe	Mild vs. severe
		0.010439	0.040	9.70 x 10-5
Comorbidities statistics
Cardiovascular	32 (53.33%)	6 (30.00%)	11 (55.00%)	15 (75.00%)
p-value		Mild vs. moderate	Moderate vs. severe	Mild vs. severe
		0.006695	0.079	0.000011
Respiratory	11 (18.33%)	0 (0.00%)	4 (20.00%)	7 (35.00%)
p-value		Mild vs. moderate	Moderate vs. severe	Mild vs. severe
		7.74 x 10-6	0.043	3.30 x 10-9
Metabolic	17 (28.33%)	0 (0.00%)	9 (45.00%)	8 (40.00%)
p-value		Mild vs. moderate	Moderate vs. severe	Mild vs. severe
		1.97 x 10-11	0.588	2.54 x 10-10
Other	19 (31.67%)	4 (20.00%)	4 (20.00%)	11 (55.00%)
p-value		Mild vs. moderate	Moderate vs. severe	Mild vs. severe
		1000	0.000053	0.000053
