# Supplementary material for: IDENTIFICATION OF HUMAN GENETIC VARIANTS MODULATING THE COURSE OF COVID-19 INFECTION
Source: Research Square preprint supplement (doi:10.21203/rs.3.rs-2397519/v1), 2023-01-12
Supplement: Supplementary file 2 [file 6e3fdb83e38cf3254e3cebcf.xlsx]

## Sheet: Sheet1
rs number	Position	Change	Mild symptom group (%)	Moderate symptom group (%)	Severe symptom group (%)
CD55
rs11120753	1:207527285	G>A	22.2	20	5
p-value			Mild vs. moderate	Moderate vs. severe	Mild vs. severe
			0.735	0.0027	0.000974
IL1B
rs1681980552	2:113588756	delAAA	10	10	25
p-value			Mild vs. moderate	Moderate vs. severe	Mild vs. severe
			1000	0.011	0.011
rs1143634	2:113590390	G>A	11.11	10	30
p-value			Mild vs. moderate	Moderate vs. severe	Mild vs. severe
			0.809	0.001565	0.00322
IL4
rs2243290	5:132018169	C>A	15.00	30.00	30.00
p-value			Mild vs. moderate	Moderate vs. severe	Mild vs. severe
			0.025	1000	0.025
IRF7
rs34948036	11:612823	insT	22.22	40	40
p-value			Mild vs. moderate	Moderate vs. severe	Mild vs. severe
			0.024	1000	0.024
rs1051390	11:613165	G>C	11.11	10.00	30.00
p-value			Mild vs. moderate	Moderate vs. severe	Mild vs. severe
			0.809	0.001565	0.00322
rs12422022	11:613192	A>G	11.11	10.00	30.00
p-value			Mild vs. moderate	Moderate vs. severe	Mild vs. severe
			0.809	0.001565	0.00322
rs1131665	11:613208	T>C	11.11	10.00	30.00
			Mild vs. moderate	Moderate vs. severe	Mild vs. severe
			0.809	0.001565	0.00322
DDX58
rs10813831	9:32526146	G>A	11.11	10	25
p-value			Mild vs. moderate	Moderate vs. severe	Mild vs. severe
			0.809	0.011	0.021
rs1213032873	9:32485288	insA	0.00	0.00	10.00
p-value			Mild vs. moderate	Moderate vs. severe	Mild vs. severe
			N/A	0.001565	0.001565
TMPRSS2
rs17854725	21:42845383	A>G	44.44	40.00	70.00
p-value			Mild vs. moderate	Moderate vs. severe	Mild vs. severe
			0.629	0.004231	0.017
rs73230068	21:42845167	G>C	0.00	10.00	15.00
p-value			Mild vs. moderate	Moderate vs. severe	Mild vs. severe
			0.001565	0.317	0.000108
ACE2
rs2285666	X:15610348	C>T	15.00	25.00	5.00
p-value			Mild vs. moderate	Moderate vs. severe	Mild vs. severe
			0.114	0.000261	0.025
