# Supplementary material for: IDENTIFICATION OF HUMAN GENETIC VARIANTS MODULATING THE COURSE OF COVID-19 INFECTION
Source: Research Square preprint supplement (doi:10.21203/rs.3.rs-2397519/v1), 2023-01-12
Supplement: Supplementary file 3 [file 80503ae064d7cd4fa1bcf6fd.xlsx]

## Sheet: Sheet1
Gene	Position (GRCh37)	rs number	Nucleotide change	Primer pair (forward and reverse)	Annealing temperature
TMPRSS2	21:42845383	rs17854725	A>G	F 5'-GACCTGCTCAAGGTCACA-3'	60°C
				R 5'-TGTCCTTGCAGCCTGGG-3'
TMPRSS2	21:42852497	rs12329760	C>T	F 5'-AGCACTCATGTGCCGGTG-3'	58°C
				R 5'-TGGATAATCCTCCCTCTGG-3'
ACE2	X:15610348	rs751170930	C>T	F 5'-CATTCATGTCCTTGCCCTTA-3'	56°C
				R 5'-GTGGTCAAAAGGATATCTTTAT-3'
IFITM3	11:320007	rs370862493	G>A	F 5'-GGATGCCCAGAATCAGGG-3'	58°C
				R 5'-TGAGGAAGGGGAGGAGGT-3'
IL4	5:132018169	rs2243290	C>A	F 5'-GACAAGTGCCACAGTAGG-3'	58°C
				R 5'-GCTCGAACACTTTGAATATTT-3'
