# Supplementary material for: IDENTIFICATION OF HUMAN GENETIC VARIANTS MODULATING THE COURSE OF COVID-19 INFECTION
Source: Research Square preprint supplement (doi:10.21203/rs.3.rs-2397519/v1), 2023-01-12
Supplement: Supplementary file 4 [file c3e5066c9fff6f46736e7d5d.xlsx]

## Sheet: Sheet1
Gene	Number of patients with detected changes	Number of detected variants
CD55	23 (38.33%)	5
IL1A	35 (58.33%)	3
IL1B	26 (43.33%)	6
IL2	0 (0.00%)	0
IL4	21 (35.00%)	4
IL6	2 (3.33%)	2
IRF7	45 (75.00%)	16
IRF9	0 (0.00%)	0
TNFα	2 (3.33%)	1
DDX58	26 (43.33%)	18
TMPRSS2	58 (96.67%)	23
ACE2	13 (21.67%)	3
IFITM3	16 (26.67%)	5
